# Supplementary material for: Clarification of Phylogenetic Relationships among Chinese Nemacheilids with Tube-Shaped Anterior Nostrils, with a Description of a New Genus and Two New Species
Source: Hindawi journal article supplement (doi:10.1155/2023/3600085), 2023-06-02
Supplement: f1 [file 3600085.f1.docx]

Supplementary Table S1. Samples of Chinese nemachilids and outgroups used in this study.

| Taxon name | Locality | GenBank Accession No. | Reference |
| --- | --- | --- | --- |
| *Leptobotia elongata* | Panzhihua City, Sichuan Province, China | JQ230103 | Li et al., 2012 |
| *Parabotia fasciata* | Not mentioned | KM393223 | Wei et al., 2016 |
| *Barabatula nuda* | Liaoyang City, Liaoning, China | KF574248 | Yang et al., 2019 |
| *Claea dabryi* | Pengzhou, Chengdu City, Sichuan, China | NC029242 | Li et al., 2017 |
| *Eonemachilus longidorsalis* | unknown | OM732331 | from GenBank |
| *Eonemachilus niger* | unknown | NC063106 | from GenBank |
| *Guinemachilus bailianensis* | Qianjiang Town, Laibin City, Guangxi, China | NC061031 | from GenBank |
| *Guinemachilus bailianensis* | Qianjiang Town, Laibin City, Guangxi, China | ON116504 | Luo et al., 2023 |
| *Guinemachilus longibarbatus* | Tongjin Village, Hechi City, Guangxi | ON116508 | Luo et al., 2023 |
| *Guinemachilus longibarbatus* | Gaoling Town, Du'an County, Guangxi, China | ON148334 | Luo et al., 2023 |
| *Guinemachilus pseudopulcherrimus* sp. nov. | Dongmiao Village, Du’an County, Hechi City, Guangxi, China | OQ024375 | This study |
| *Guinemachilus pseudopulcherrimus* sp. nov. | Dongmiao Village, Du’an County, Hechi City, Guangxi, China | OQ024376 | This study |
| *Guinemachilus pseudopulcherrimus* sp. nov. | Dongmiao Village, Du’an County, Hechi City, Guangxi, China | OQ024377 | This study |
| *Guinemachilus pseudopulcherrimus* sp. nov. | Dongmiao Village, Du’an County, Hechi City, Guangxi, China | OQ024380 | This study |
| *Heminoemacheilus parva* | Ande Town, Jingxi City, Guangxi, China | ON116520 | Luo et al., 2023 |
| *Homatula berezowskii* | Qujing City, Yunnan, China | MH125163 | Li et al., 2020 |
| *Homatula potanini* | Suijiang, Sichuan, China | KP749475 | Que et al., 2016 |
| *Lefua costata* | unknown | NC029385 | from GenBank |
| *Lefua echigonia* | Not mentioned | AB054126 | Miya et al., 2015 |
| *Lefua nikkonis* | Not mentioned | NC027662 | Miya et al., 2015 |
| *Micronemacheilus cruciatus* | unknown | NC033960 | from GenBank |
| *Micronemacheilus pulcherrimus* | Du'an County, Hechi City, Guangxi, China | OQ024374 | This study |
| *Micronemacheilus pulcherrimus* | Liuzhou City, Guangxi, China | MK387705 | Luo et al., 2019 |
| *Oreonectes guananensis* | Changmei Town, Huanjiang County, Guangxi, China | ON116507 | Luo et al., 2023 |
| *Oreonectes luochengensis* | Tianhe Town, Luocheng County, Guangxi, China | ON116495 | Luo et al., 2023 |
| *Oreonectes platycephalus* | unknown | NC031579 | from GenBank |
| *Oreonectes polystignus* | Dubu Town, Guilin City, Guangxi, China | ON116514 | Luo et al., 2023 |
| *Paranemachilus chongzuo* sp. nov. | Daxin County, ChongzuoCity, Guangxi, China | MW532082 | Du et al., 2021 |
| *Paranemachilus genilepis* | Fusui County, Guangxi, China | MT845213 | Luo et al., 2020 |
| *Paranemachilus jinxiensis* | Tiandong County, Guangxi, China | NC039380 | Huang et al., 2019 |
| *Paranemachilus pingguoensis* | Pingguo City, Guangxi, China | MW043720 | Zhou et al., 2022 |
| *Paranemachilus zhengbaoshani* | Disu Town, Du'an County, Guangxi, China | OQ024379 | This study |
| *Paranemachilus zhengbaoshani* | Du’an County, Guangxi, China | ON116530 | Luo et al., 2023 |
| *Petruichthys brevis* | unknown | NC031637 | from GenBank |
| *Schistura reticulofasciata* | Kanamakra stream, Chirang district, Assam, India | NC034745 | Siva et al., 2018 |
| *Schistura sikmaiensis* | Khonglah, Meghalaya, India | NC034746 | Sharma et al., 2020 |
| *Traccatichthys pulcher* | Beijiang River, Shaoguan City, Guangdong, China | KF765806 | Chen et al., 2022 |
| *Triplophysa sellaefer* | Juma River, Baoding City, Hebei, China | KY851112 | Feng et al., 2019 |
| *Triplophysa tibetana* | Lhasa River, Tibet, China | KM212178 | Wang et al., 2019 |
| *Triplophysa xiangxiensis* | Feihu Cave, Longshan County, Hunan, China | NC029492 | Wang et al., 2015 |
| *Troglonectes daqikongensis* | Libo County, Guizhou, China | MG738689 | Yang, 2020 |
| *Troglonectes furcocaudalis* | Rong'an County, Guangxi, China | NC032384 | Luo et al., 2017 |
| *Troglonectes longibarbatus* | Libo County, Guizhou, China | MT361977 | from GenBank |
| *Troglonectes retrodorsalis* | Liuzhai Town, Nandan County, Guangxi, China | ON116511 | Luo et al., 2023 |
| *Troglonectes retrodorsalis* | Liuzhai Town, Nandan County, Guangxi, China | OQ024378 | This study |
| *Yunnanilus analis* | Qujing City, Yunnan, China | MW729320 | from GenBank |
| *Yunnanilus jiuchiensis* | Jiuchi County, Pengzhou City, Sichuan, China | MW532080 | Du et al., 2021 |
| *Yunnanilus pleurotaenia* | Kunming City, Yunnan, China | OQ024381 | This study |
| *Yunnanilus pleurotaenia* | unknown | MW192447 | from GenBank |

**Supplementary Description**

Sequences used in this study with GenBank accession Nos., locality and references. These references sequences availability in NCBI GenBank were retrieved for phylogenetic tree reconstruction.

References.

Chen XJ., Song L., Liu WZ. 2022. The complete mitochondrial genome of the freshwater fish *Traccatichthys pulcher* (Cypriniformes: Nemacheilidae) from China. *Mitochondrial DNA Part B*, 7(7): 1400–1402.

Feng X., Chen YX., Sui XY., Chen YF. 2019. The complete mitochondrial genome of *Triplophysa sellaefer* (Cypriniformes: Balitoridae). *Mitochondrial DNA Part B*, 4(1): 536–537.

Huang W., Shi GF., He AY., Wen YH., Huang J., Luo F.G. 2019. Characterization of complete mitochondrial genome of *Yunnanilus jinxiensis* (Cypriniformes, Balitoridae, Nemacheilidae). *Mitochondrial DNA Part B*, 4(1): 185–186.

Li P., Yang CZ., Tu FY., Liu GX. 2012. The complete mitochondrial genome of the Elongate loach *Leptobotia elongata* (Cypriniformes: Cobitidae). *Mitochondrial DNA*, 23(5): 352–354.

Li Q., Liu Y., Chen YY., Xiao Y., Du J. 2017. The complete mitochondrial genome of *Claea dabryi* (Teleostei, Nemachilinae, *Claea*). *Mitochondrial DNA Part A*, 28(3): 319–321.

Li Y., Mo HL., Xu J., Wu L., Wang LX. 2020. The complete mitochondrial genome of *Homatula berezowskii* (Cypriniformes, Nemacheilidae, Nemachilinae). *Mitochondrial DNA Part B*, 5(3): 3590–3591,

Luo CQ., Li YS., Yang PH., Wang SQ. 2020. The complete mitochondrial genome of *Paranemachilus genilepis* (Zhu 1983) (Cypriniformes: Nemacheilidae) and its phylogenetic status. *Mitochondrial DNA Part B*, 5(3): 3685–3687.

Luo FG., Huang J., Liu JL., Situ L., Liu X., Wen YH. 2017. Characterization of complete mitochondrial genome of *Oreonectes furcocaudalis* (Cypriniformes, Balitoridae, Nemacheilidae). *Mitochondrial DNA Part B*, 2(1): 69–70.

Luo FG., Huang J., Luo T., Yang J., Zhou HJ., Wen YH. 2019. Complete mitochondrial genome and phylogenetic analysis of *Yunnanilus pulcherrimus* (Cypriniformes, Nemacheilidae). *Mitochondrial DNA Part B*, 4(1): 1269–1270.

Luo T., Wang YL., Xiao N., Yang X., Zhou JJ., Deng HQ., Zhou J. 2023. Phylogenetic relationships of the Chinese cave loaches (Cypriniformes, Nemacheilidae) revealed by phylogenetic analysis of mitochondrial. *Zoological Research* (in press).

Miya M, Sato Y., Fukunaga T., Sado T., Poulsen JY., Sato K., Minamoto T., Yamamoto S., Yamanaka H., Araki H., Kondoh M., Iwasaki W. 2015. MiFish, a set of universal PCR primers for metabarcoding environmental DNA from fishes: detection of more than 230 subtropical marine species. *Royal Scociety Open Science*, 2: 150088.

Que YF., Tang HY., Xu N., Xu DM., Shi F., Yang Z., Li WT. 2016. Characterization of the complete mitochondrial genome sequence of *Homatula potanini* (Cypriniformes, Nemacheilidae, Nemachilinae). *Mitochondrial DNA Part A*, 27(2): 1297–1299.

Sharma AS., Siva C., Laskar MA., Sumer S., Sahoo PK. 2020. The complete mitochondrial genome of the stream loach (*Schistura sikmaiensis*) and its phylogenetic implications. *Journal of Entomology and Zoology Studies*, 8(2): 504–510.

Siva C., Kumar R., Sharma L., Laskar MA., Sumer S., Barat A., Sahoo PK. 2018. The complete mitochondrial genome of a stream loach (*Schistura reticulofasciata*) and its phylogeny. *Conservation Genetics Resources*, 10: 829–832.

Wang JL., Li L., Jin X., Wang P., Du Y., Ma B. 2019. The complete mitochondrial genome of *Triplophysa tibetana*. *Mitochondrial DNA Part B*, 4(1): 1411–1412.

Wang X., Cao L., Zhang E. 2015. The complete mitochondrial genome sequence of *Triplophysa xiangxiensis* (Teleostei: Nemacheilidae). *Mitochondrial DNA*, 1–2.

Wei M., Yu P., Yang YM., Wan Q. 2016. The complete mitochondrial genome of *Parabotia fasciata* (Cypriniformes: Cobitidae). *Mitochondria DNA*, 27(3): 1831–1832.

Yang YP., Chen H., Chen YX. 2019. The complete mitochondrial genome of *Barbatula nuda* and *B. toni* (Teleostei: Nemacheilidae). *Mitochondrial DNA Part B*, 4(2): 2585–2587.

Zhou L., Huagn SH., Wang Q., Li ZH., Li ZY., He AY., Chen JH., Liu L., Zou KS. 2022. Novel evolutionary insights into nemacheilid cavefish: evidence from comparatvie analysis of mitochondrial genomes. *Journal of Oceanology and Limnology*, 40(4): 1640–1653.
